# Supplementary material
Source: ML conference proceedings conference paper supplement (https://proceedings.mlr.press/v97/peng19b.html)
Supplement: Supplementary file [file peng19b-supp.pdf]

# Supplementary Materials

## A. Model Architecture

We provide the detailed model architecture (Table 5 and Table 7) for each component in our model: Generator, Disentangler, Domain Classifier, Classifier and MINE.

Table 5. Model Architecture for ‘Digit-Five’. For each convolution layer, we list the input dimension, output dimension, kernel size, stride, and padding. For the fully-connected layer, we provide the input and output dimensions. For drop-out layers, we provide the probability of an element to be zeroed.

| layer                        | configuration                               |
|------------------------------|---------------------------------------------|
| Feature Generator            |                                             |
| 1                            | Conv2D (3, 64, 5, 1, 2), BN, ReLU, MaxPool  |
| 2                            | Conv2D (64, 64, 5, 1, 2), BN, ReLU, MaxPool |
| 3                            | Conv2D (64, 128, 5, 1, 2), BN, ReLU         |
| Disentangler                 |                                             |
| 1                            | FC (8192, 3072), BN, ReLU                   |
| 2                            | DropOut (0.5), FC (3072, 2048), BN, ReLU    |
| Domain Identifier            |                                             |
| 1                            | FC (2048, 256), LeakyReLU                   |
| 2                            | FC (256, 2), LeakyReLU                      |
| Class Identifier             |                                             |
| 1                            | FC (2048, 10), BN, Softmax                  |
| Reconstructor                |                                             |
| 1                            | FC (4096, 8192)                             |
| Mutual Information Estimator |                                             |
| fc1_x                        | FC (2048, 512)                              |
| fc1_y                        | FC (2048, 512), LeakyReLU                   |
| 2                            | FC (512,1)                                  |

## B. Details of datasets

We provide the detailed information of datasets (Table 6). For Digit-Five and the DomainNet dataset, we provide the train/test split for each domain and for Office-Caltech10, we provide the number of images in each domain.

Table 6. Detailed information for datasets

| Digit-Five       |               |                |             |               |             |            |         |
|------------------|---------------|----------------|-------------|---------------|-------------|------------|---------|
| Splits           | <i>mnist</i>  | <i>mnist'm</i> | <i>svhn</i> | <i>syn</i>    | <i>usps</i> | Total      |         |
| Train            | 55,000        | 55,000         | 25,000      | 25,000        | 7,348       | 167,348    |         |
| Test             | 10,000        | 10,000         | 14,549      | 9,000         | 1,860       | 37,309     |         |
| Office-Caltech10 |               |                |             |               |             |            |         |
| Splits           | <i>amazon</i> | <i>caltech</i> | <i>dslr</i> | <i>webcam</i> | Total       |            |         |
| Total            | 958           | 1,123          | 157         | 295           | 2,533       |            |         |
| DomainNet        |               |                |             |               |             |            |         |
| Splits           | <i>clp</i>    | <i>inf</i>     | <i>pnt</i>  | <i>qdr</i>    | <i>rel</i>  | <i>skt</i> | Total   |
| Train            | 34,019        | 37,087         | 52,867      | 120,750       | 122,563     | 49,115     | 416,401 |
| Test             | 14,818        | 16,114         | 22,892      | 51,750        | 52,764      | 21,271     | 179,609 |

Table 7. Model Architecture for ‘Office-Caltech10’ and ‘DomainNet’. For each convolution layer, we list the input dimension, output dimension, kernel size, stride, and padding. For the fully-connected layer, we provide the input and output dimensions. For drop-out layers, we provide the probability of an element to be zeroed.

| layer                                   | configuration                           |
|-----------------------------------------|-----------------------------------------|
| Feature Generator: ResNet101 or AlexNet |                                         |
| Disentangler                            |                                         |
| 1                                       | Dropout(0.5), FC (2048, 2048), BN, ReLU |
| 2                                       | Dropout(0.5), FC (2048, 2048), BN, ReLU |
| Domain Identifier                       |                                         |
| 1                                       | FC (2048, 256), LeakyReLU               |
| 2                                       | FC (256, 2), LeakyReLU                  |
| Class Identifier                        |                                         |
| 1                                       | FC (2048, 10), BN, Softmax              |
| Reconstructor                           |                                         |
| 1                                       | FC (4096, 2048)                         |
| Mutual Information Estimator            |                                         |
| fc1_x                                   | FC (2048, 512)                          |
| fc1_y                                   | FC (2048, 512), LeakyReLU               |
| 2                                       | FC (512,1)                              |
